# Supplementary material for: Integrated Network Pharmacology Analysis and In Vitro Validation Revealed the Potential Active Components and Underlying Mechanistic Pathways of Herba Patriniae in Colorectal Cancer
Source: MDPI journal article supplement (doi:10.3390/molecules26196032), 2021-10-05
Supplement: s1 [file s1]

# **Integrated Network Pharmacology Analysis and In Vitro Validation Revealed the Potential Active Components and Underlying Mechanistic Pathways of Herba Patriniae in Colorectal Cancer**

Huihai Yang <sup>1</sup>, Man-Kit Cheung <sup>2</sup>, Grace Gar-Lee Yue <sup>1</sup>, Ping-Chung Leung <sup>1</sup>,  
Chun-Kwok Wong <sup>1,3</sup>, Clara Bik-San Lau <sup>1,4,\*</sup>

<sup>1</sup> Institute of Chinese Medicine and State Key Laboratory of Research on Bioactivities and Clinical Applications of Medicinal Plants, The Chinese University of Hong Kong, Shatin, New Territories, Hong Kong

<sup>2</sup> Department of Surgery, The Chinese University of Hong Kong, Shatin, New Territories, Hong Kong

<sup>3</sup> Department of Chemical Pathology, The Chinese University of Hong Kong, Shatin, New Territories, Hong Kong

<sup>4</sup> Li Dak Sum Yip Yio Chin R&D Centre for Chinese Medicine, The Chinese University of Hong Kong, Shatin, New Territories, Hong Kong

**Running title:** Network pharmacology of the Herba Patriniae (Bai Jiang Cao)

## **\*Correspondence:**

Prof. Clara Bik San Lau

Institute of Chinese Medicine

E305, Science Centre East Block

The Chinese University of Hong Kong

Shatin, New Territories, Hong Kong

Email: [claralau@cuhk.edu.hk](mailto:claralau@cuhk.edu.hk)

ORCID: 0000-0002-7409-1270

**Table S1.** Chemical constituents of *Patrinia heterophylla* water extract detected by UHPLC-MS

| Compounds     | Retention times<br>(min) | Molecular weights | Precursors and products |
|---------------|--------------------------|-------------------|-------------------------|
| Asperglaucide | 11.874                   | 444.57            | 445→123                 |
| Villosolside  | 3.253                    | 362.42            | 363→183                 |
| Villosol      | 3.581                    | 200.26            | 201→109                 |
| Ascorbic acid | 1.049                    | 176.14            | 175→59                  |

**Table S2.** Gene primers sequences

| Gene names | Species | Forward primers        | Reverse primers          |
|------------|---------|------------------------|--------------------------|
| EGFR       | Human   | TCCCTCAGCCACCCATATGTAC | GTCTCGGGCCATTTTGGAGAATTC |
| PIK3CA     | Human   | TGGATGCTCTACAGGGCTTT   | GTCTGGGTTCTCCCAATTCA     |
| AKT1       | Human   | TCTATGGCGCTGAGATTGTG   | CTTAATGTGCCCGTCCTTGT     |
| GAPDH      | Human   | CGAGATCCCTCCAAAATCAA   | GGTGCTAAGCAGTTGGTGGT     |

**Table S3.** Lists of antibodies used for the western blot assays

| <b>Antibodies</b>                        | <b>Species</b> | <b>Producers</b>          | <b>Cat. No.</b> | <b>Dilution (WB)</b> |
|------------------------------------------|----------------|---------------------------|-----------------|----------------------|
| EGFR                                     | Rabbit         | Cell Signaling Technology | 4267S           | 1:1000               |
| p-EGFR                                   | Rabbit         | Cell Signaling Technology | 3777S           | 1:1000               |
| PI3K                                     | Rabbit         | Cell Signaling Technology | 3358S           | 1:1000               |
| p-PI3K                                   | Rabbit         | Cell Signaling Technology | 4228S           | 1:1000               |
| AKT                                      | Rabbit         | Cell Signaling Technology | 4685S           | 1:1000               |
| p-AKT                                    | Rabbit         | Cell Signaling Technology | 4058S           | 1:1000               |
| Cathepsin B                              | Rabbit         | Cell Signaling Technology | 31718S          | 1:1000               |
| β-actin                                  | Mouse          | Sigma                     | A5316           | 1:3000               |
| HRP-labeled Goat<br>Anti-Rabbit IgG(H+L) | Goat           | Akoya Biosciences         | 200319028       | 1:3000               |
| HRP-labeled Goat<br>Anti-Mouse IgG(H+L)  | Goat           | Akoya Biosciences         | 200402006       | 1:3000               |

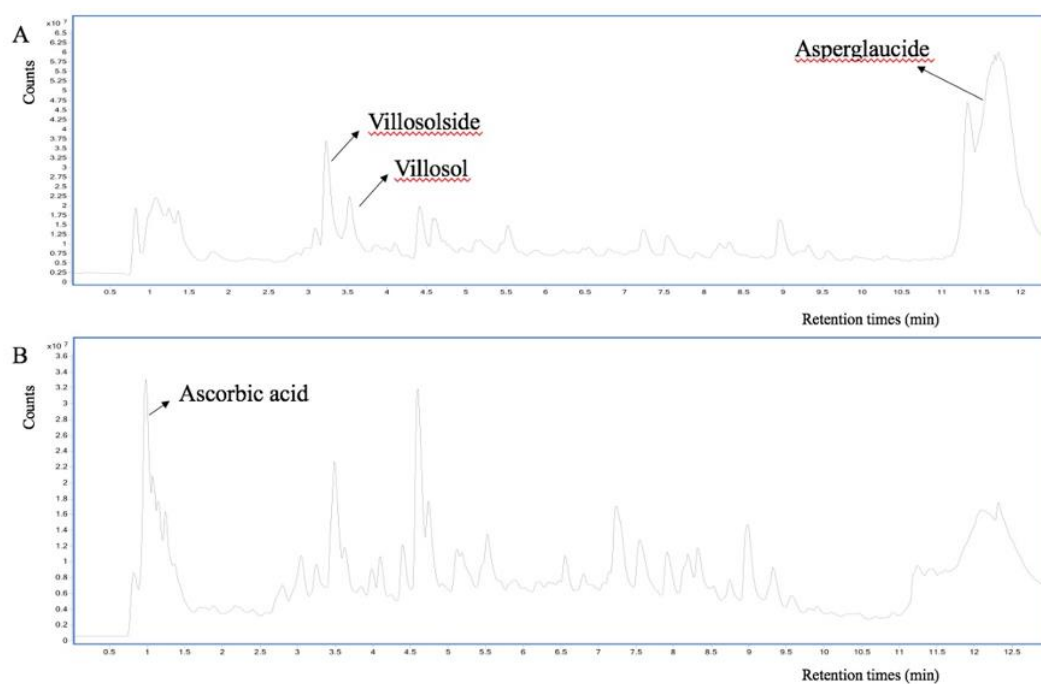

**Figure S1.** Full chromatogram of *Patrinia heterophylla* water extract detected by UHPLC-MS. (A) positive mode; (B) negative mode.
